# Supplementary material for: Estimation of Effect on Gross Domestic Product of Production Factors Using CES and Translog Production Functions: An Application to China Economy
Source: Research Square preprint supplement (doi:10.21203/rs.3.rs-114621/v1), 2020-12-01
Supplement: Supplementary file 1 [file c36df298d3921cd626a90e1c.xlsx]

## Sheet: Sayfa1
Year	Q	K	L	E
1994	48197.9	17042.1	67455	122737
1995	60793.7	20019.3	68065	131176
1996	71176.6	22913.5	68950	138948
1997	78973	24941.1	69820	137798
1998	84402.3	28406.2	70637	132214
1999	89677.1	29854.7	71394	133831
2000	99214.6	32917.7	72085	138553
2001	109655	37213.5	72797	143199
2002	120333	43499.9	73280	151797
2003	135823	55566.6	73736	174990
2004	159878	70477.4	74264	203227
2005	184937	88773.6	74647	224682
2006	216314	109998	74978	246270
2007	265810	137324	75321	265480
2008	314045	172828	75564	291448
2009	340903	224599	75828	306647
2010	401513	251684	76105	324939
2011	473104	311485	76420	348002
2012	519470	374695	76704	361732
2013	568845	447074	76977	375252
2014	636463	512761	77253	426000
